# Supplementary material for: Japanese cancer patient participation in and satisfaction with treatment-related decision-making: A qualitative study
Source: Springer Nature journal article supplement (doi:10.1186/1471-2458-8-77), 2008-02-27
Supplement: 12889_2007_1047_MOESM1_ESM.pdf [file 12889_2007_1047_MOESM1_ESM.pdf]

|                                                                         |              | Final decision maker                                                                                                            |                                                                                                 |
|-------------------------------------------------------------------------|--------------|---------------------------------------------------------------------------------------------------------------------------------|-------------------------------------------------------------------------------------------------|
|                                                                         |              | Doctor                                                                                                                          | Patient                                                                                         |
| Overall satisfaction with the treatment-related decision-making process | Satisfied    | <ul style="list-style-type: none"> <li>➤ <u>Doctor selection</u></li> <li>➤ <u>Wilfully entrusting the physician</u></li> </ul> | <ul style="list-style-type: none"> <li>➤ <u>Patient as the active decision maker</u></li> </ul> |
|                                                                         | Dissatisfied | <ul style="list-style-type: none"> <li>➤ <u>Surrendering decision-making</u></li> </ul>                                         | <ul style="list-style-type: none"> <li>➤ <u>Compelled decision-making</u></li> </ul>            |
